# Supplementary material
Source: Springer Nature journal article supplement (https://www.springermedizin.de/resource/supplementary/12937_2009_269_MOESM3_ESM.pdf/25654750)

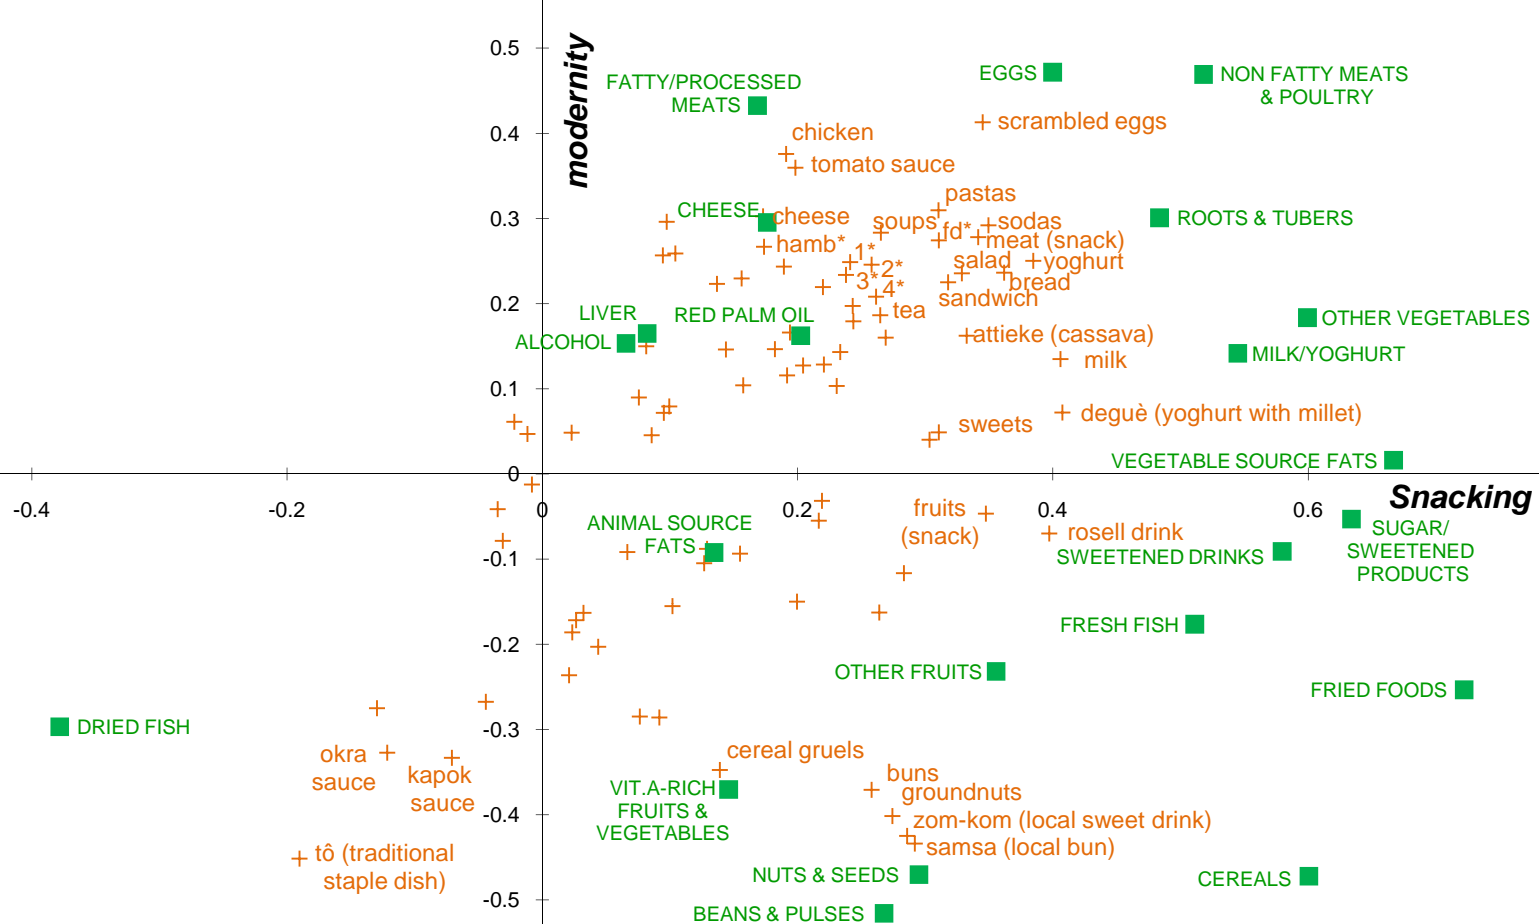

\* hamb=hamburger, fd=french dressing, 1=fried plantain, 2=tuber stew, 3=fish, 4=chocolate

Supplement: MOESM3 [file 25654750]
